# Supplementary material
Source: PubMed Central journal article supplement (PMC5552365)

**Figure S1**

**Common (PCN and TCPOBOP)**

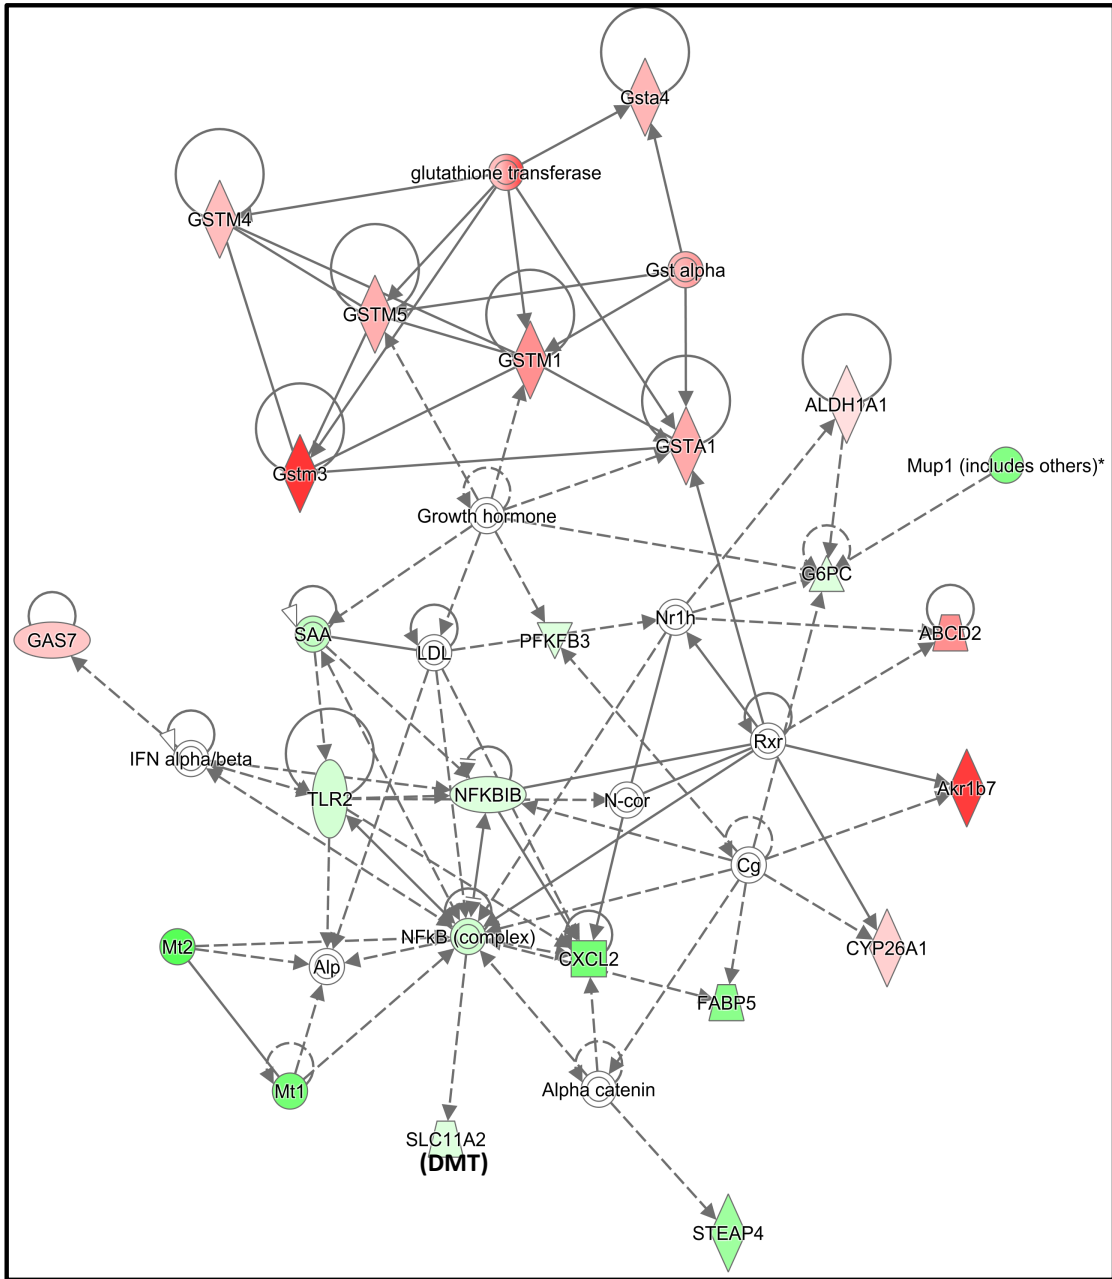

Supplement: NIHMS794191-supplement-Supplemental_Figures.pdf [file NIHMS794191-supplement-Supplemental_Figures.pdf]
